# Supplementary material for: Methods to systematically review and meta-analyse observational studies: a systematic scoping review of recommendations
Source: PubMed Central journal article supplement (PMC5963098; doi:10.1186/s12874-018-0495-9), 2018-05-21
Supplement: 12874_2018_495_MOESM2_ESM.pdf [file 12874_2018_495_MOESM2_ESM.pdf]

((epidemiological methods [MeSH Terms] OR guideline\*  
OR recommend\* OR comment [Publication Type] OR  
critical\* apprais\* OR standards))

AND

((“Meta-Analysis [Publication Type] OR “Meta-Analysis as  
Topic” [MeSH] OR meta-analysis OR metaanalysis OR  
“meta-analysis” OR “metaanalysis” OR “systematic  
review”))

AND

(observational OR non-randomized stud\* OR case-control  
OR “case control” OR “case-control” OR cohort OR cross  
section\* OR “cross sectional” OR “cross-sectional”))
