# Supplementary material for: Methods to systematically review and meta-analyse observational studies: a systematic scoping review of recommendations
Source: Springer Nature journal article supplement (doi:10.1186/s12874-018-0495-9), 2018-05-21
Supplement: MOESM3 [file 15779006]

**Table S1: Sources of recommendations**

| <b>Authors, year</b>      | <b>Origin</b> | <b>Journal type</b>                                 | <b>Affiliation of authors<sup>1</sup></b> |
|---------------------------|---------------|-----------------------------------------------------|-------------------------------------------|
| Abrams, 1995 [103]        | CMR           | Health sciences journal                             | Statistics or epidemiology department     |
| Armstrong, 2007 [39]      | Experts       | Systematic review methods journal                   | Systematic review methods organisation    |
| Ashford, 2009 [36]        | Medline       | Health sciences journal                             | Health sciences department                |
| Austin, 1997 [76]         | CMR           | Epidemiology, statistics or general methods journal | Statistics or epidemiology department     |
| Balshem, 2011 [85]        | Medline       | Epidemiology, statistics or general methods journal | Statistics or epidemiology department     |
| Blair, 1995 [34]          | Experts       | Specialist medical journal                          | Clinical department                       |
| Brockwell, 2001 [117]     | CMR           | Epidemiology, statistics or general methods journal | Statistics or epidemiology department     |
| Chaiyakunapruk, 2014 [54] | Medline       | General medical journal                             | Health sciences department                |
| Chambers, 2009 [32]       | CMR           | Epidemiology, statistics or general methods journal | Systematic review methods organisation    |
| Colditz, 1995 [78]        | CMR           | Epidemiology, statistics or general methods journal | Statistics or epidemiology department     |
| Davey Smith, 1997 [99]    | Experts       | General medical journal                             | Statistics or epidemiology department     |
| Davey Smith, 1998 [97]    | CMR           | General medical journal                             | Statistics or epidemiology department     |
| Doria, 2005 [104]         | Medline       | Specialist medical journal                          | Clinical department                       |
| Dwyer, 2001 [102]         | CMR           | Epidemiology, statistics or general methods journal | Statistics or epidemiology department     |
| Egger, 1997a [29]         | Experts       | General medical journal                             | Statistics or epidemiology department     |
| Egger, 1997b [98]         | Experts       | General medical journal                             | Statistics or epidemiology department     |
| Fraser, 2006 [58]         | CMR           | Epidemiology, statistics or general methods journal | Statistics or epidemiology department     |
| Friedenreich, 1994 [31]   | CMR           | Epidemiology, statistics or general methods journal | Statistics or epidemiology department     |
| Furlan, 2006 [59]         | CMR           | Epidemiology, statistics or general methods journal | Statistics or epidemiology department     |
| Golder, 2008 [60]         | CMR           | Epidemiology, statistics or general methods journal | Systematic review methods organisation    |
| Greenland, 1994 [86]      | CMR           | Epidemiology, statistics or general methods journal | Statistics or epidemiology department     |
| Guyatt, 2011a [96]        | Medline       | Epidemiology, statistics or general methods journal | Statistics or epidemiology department     |
| Guyatt, 2011b [45]        | Medline       | Epidemiology, statistics or general methods journal | Statistics or epidemiology department     |
| Guyatt, 2011c [94]        | Medline       | Epidemiology, statistics or general methods journal | Statistics or epidemiology department     |
| Guyatt, 2011d [107]       | Medline       | Epidemiology, statistics or general methods journal | Statistics or epidemiology department     |
| Hartemink, 2006 [110]     | Medline       | Epidemiology, statistics or general methods journal | Statistics or epidemiology department     |
| Haynes, 2005 [57]         | CMR           | Epidemiology, statistics or general methods journal | Statistics or epidemiology department     |
| Herbison, 2006 [93]       | Medline       | Epidemiology, statistics or general methods journal | Statistics or epidemiology department     |

| <b>Authors, year</b>           | <b>Origin</b> | <b>Journal type</b>                                 | <b>Affiliation of authors<sup>1</sup></b> |
|--------------------------------|---------------|-----------------------------------------------------|-------------------------------------------|
| Hernandez, 2016 [108]          | Medline       | Health sciences journal                             | Statistics or epidemiology department     |
| Higgins, 2013 [65]             | Experts       | Systematic review methods journal                   | Statistics or epidemiology department     |
| Horton, 2010 [74]              | Medline       | Epidemiology, statistics or general methods journal | Statistics or epidemiology department     |
| Ioannidis, 2011[89]            | Medline       | Epidemiology, statistics or general methods journal | Statistics or epidemiology department     |
| Khoshdel, 2006 [30]            | Medline       | Specialist medical journal                          | Clinical department                       |
| Kuper, 2006 [62]               | CMR           | Epidemiology, statistics or general methods journal | Statistics or epidemiology department     |
| Lau, 1997 [16]                 | Medline       | General medical journal                             | Clinical department                       |
| Lemeshow, 2005 [63]            | CMR           | Epidemiology, statistics or general methods journal | Statistics or epidemiology department     |
| Loke, 2011 [64]                | Experts       | Specialist medical journal                          | Statistics or epidemiology department     |
| Loke, 2007 [35]                | Medline       | Epidemiology, statistics or general methods journal | Systematic review methods organisation    |
| MacDonald-Jankowski, 2001 [46] | Medline       | Specialist medical journal                          | Clinical department                       |
| Mahid, 2006 [55]               | Medline       | Specialist medical journal                          | Clinical department                       |
| Manchikanti, 2009 [47]         | Medline       | Specialist medical journal                          | Clinical department                       |
| Martin, 2000 [80]              | CMR           | Epidemiology, statistics or general methods journal | Statistics or epidemiology department     |
| McCarron, 2010 [115]           | Medline       | Epidemiology, statistics or general methods journal | Statistics or epidemiology department     |
| Moola, 2015 [41]               | Medline       | Epidemiology, statistics or general methods journal | Systematic review methods organisation    |
| Moreno, 1996 [81]              | CMR           | Epidemiology, statistics or general methods journal | Statistics or epidemiology department     |
| Munn, 2015 [72]                | Medline       | Epidemiology, statistics or general methods journal | Systematic review methods organisation    |
| Naumann, 2007 [67]             | Experts       | Systematic review methods journal                   | Systematic review methods organisation    |
| Normand, 1999 [48]             | CMR           | Epidemiology, statistics or general methods journal | Statistics or epidemiology department     |
| Norris, 2013 [71]              | Experts       | Systematic review methods journal                   | Statistics or epidemiology department     |
| O'Connor, 2014 [42]            | Medline       | Health sciences journal                             | Health sciences department                |
| Pladevall-Vila, 1996 [101]     | Medline       | Epidemiology, statistics or general methods journal | Clinical department                       |
| Prevost, 2000 [118]            | Medline       | Epidemiology, statistics or general methods journal | Statistics or epidemiology department     |
| Price, 2004 [49]               | Medline       | Specialist medical journal                          | Systematic review methods organisation    |
| Raman, 2012 [50]               | Medline       | Epidemiology, statistics or general methods journal | Statistics or epidemiology department     |
| Ravani, 2015 [43]              | Medline       | Specialist medical journal                          | Statistics or epidemiology department     |
| Robertson, 2014 [95]           | Journal       | Systematic review methods journal                   | Health sciences department                |
| Rosenthal, 2001 [51]           | CMR           | Specialist medical journal                          | Clinical department                       |
| Sagoo, 2009 [33]               | CRD           | General medical journal                             | Statistics or epidemiology department     |

| <b>Authors, year</b>       | <b>Origin</b> | <b>Journal type</b>                                 | <b>Affiliation of authors<sup>1</sup></b> |
|----------------------------|---------------|-----------------------------------------------------|-------------------------------------------|
| Salanti, 2005 [88]         | Medline       | Specialist medical journal                          | Statistics or epidemiology department     |
| Salanti, 2009 [111]        | Medline       | Epidemiology, statistics or general methods journal | Statistics or epidemiology department     |
| Sanderson, 2007 [91]       | Experts       | Epidemiology, statistics or general methods journal | Statistics or epidemiology department     |
| Schünemann, 2013 [40]      | Experts       | Systematic review methods journal                   | Statistics or epidemiology department     |
| Shamliyan, 2012 [90]       | Experts       | Epidemiology, statistics or general methods journal | Statistics or epidemiology department     |
| Shuster, 2007 [119]        | Medline       | Epidemiology, statistics or general methods journal | Statistics or epidemiology department     |
| Simunovic, 2009 [38]       | Medline       | Specialist medical journal                          | Clinical department                       |
| Smith, 1995 [112]          | CMR           | Epidemiology, statistics or general methods journal | Statistics or epidemiology department     |
| Souverein, 2012 [82]       | Medline       | Epidemiology, statistics or general methods journal | Health sciences department                |
| Stansfield, 2016 [68]      | Journal       | Systematic review methods journal                   | Health sciences department                |
| Sterne, 2016 [83]          | Experts       | General medical journal                             | Statistics or epidemiology department     |
| Stroup, 2000 [12]          | CMR           | General medical journal                             | Statistics or epidemiology department     |
| Sutton, 2002a [79]         | Medline       | Specialist medical journal                          | Statistics or epidemiology department     |
| Sutton, 2002b [100]        | Medline       | Epidemiology, statistics or general methods journal | Statistics or epidemiology department     |
| Tak, 2010 [52]             | Medline       | Specialist medical journal                          | Clinical department                       |
| Takkouche, 1999 [105]      | Medline       | Epidemiology, statistics or general methods journal | Statistics or epidemiology department     |
| Thomas, 2004 [53]          | EPHPP         | Health sciences journal                             | Health sciences department                |
| Thompson, 2002 [116]       | Medline       | Epidemiology, statistics or general methods journal | Statistics or epidemiology department     |
| Thompson, 2011 [113]       | Medline       | Epidemiology, statistics or general methods journal | Statistics or epidemiology department     |
| Thompson, 2014 [69]        | Journal       | Systematic review methods journal                   | Health sciences department                |
| Thornton, 2000 [61]        | CMR           | Epidemiology, statistics or general methods journal | Statistics or epidemiology department     |
| Tufanaru, 2015 [44]        | Medline       | Epidemiology, statistics or general methods journal | Systematic review methods organisation    |
| Tweedie, 1995 [114]        | CMR           | Epidemiology, statistics or general methods journal | Statistics or epidemiology department     |
| Valentine, 2013 [75]       | Experts       | Systematic review methods journal                   | Statistics or epidemiology department     |
| Verde, 2015 [84]           | Journal       | Systematic review methods journal                   | Statistics or epidemiology department     |
| Weeks, 2007 [109]          | CMR           | Health sciences journal                             | Health sciences department                |
| Wells, 2013 [37]           | Experts       | Systematic review methods journal                   | Statistics or epidemiology department     |
| West, 2002 [92]            | Experts       | Health sciences journal                             | Statistics or epidemiology department     |
| Wille-Jørgensen, 2008 [56] | Medline       | Specialist medical journal                          | Clinical department                       |
| Winegardner, 2007 [66]     | Medline       | Specialist medical journal                          | Health sciences department                |

| <b>Authors, year</b> | <b>Origin</b> | <b>Journal type</b>                                 | <b>Affiliation of authors<sup>1</sup></b> |
|----------------------|---------------|-----------------------------------------------------|-------------------------------------------|
| Wong, 2008 [87]      | Medline       | Epidemiology, statistics or general methods journal |                                           |
| Wong, 1996 [70]      | CMR           | Health sciences journal                             | Health sciences department                |
| Zeegers, 2000 [106]  | Medline       | General medical journal                             | not specified                             |
| Zingg, 2016 [73]     | Medline       | Epidemiology, statistics or general methods journal | Health sciences department                |
| Zwahlen, 2008 [77]   | Medline       | Specialist medical journal                          | Statistics or epidemiology department     |

<sup>1</sup> Affiliation assessment based on first and last author affiliations. If affiliations fit in to 2 or more categories, “systematic review methods organisation“ is given priority over other categories, then “statistics or epidemiology department“, then “clinical department“, then “other health sciences department”.

CMR: Cochrane Methodology Register
